# Supplementary material
Source: ML conference proceedings conference paper supplement (https://openaccess.thecvf.com/content/CVPR2021/html/Yang_GAN_Prior_Embedded_CVPR_2021_paper.html)
Supplement: Supplementary file 1 [file Yang_GAN_Prior_Embedded_CVPR_2021_supplemental.pdf]

# Supplementary Materials to “GAN Prior Embedded Network for Blind Face Restoration in the Wild”

Tao Yang<sup>1</sup>, Peiran Ren<sup>1</sup>, Xuansong Xie<sup>1</sup>, and Lei Zhang<sup>1,2</sup>

<sup>1</sup>DAMO Academy, Alibaba Group

<sup>2</sup>Department of Computing, The Hong Kong Polytechnic University

yangtao9009@gmail.com, peiran\_r@sohu.com, xingtong.xxs@taobao.com, cslzhang@comp.polyu.edu.hk

In this supplementary file, we provide the following materials:

- More visual comparisons of different methods on synthetic face images (referring to Section 4.4);
- More visual comparisons of different methods on real face images in the wild (referring to Section 4.5);
- Some preliminary results on face inpainting and face colorization.

## 1. Experiments on Synthetic Images

This section shows more visual results of competing methods on the blind face restoration (BFR) and face super-resolution (FSR) tasks. The experimental settings can be found in Section 4.4 in the main paper. As in the main paper, we compare our GPEN method with Pix2PixHD [8], Super-FAN [1], GFRNet [5], GWAInet [2], DFDNet [4] and HiFaceGAN [10] on the task of BFR. As for the task of FSR, we compare with Super-FAN [1], GFRNet [5], GWAInet [2], DFDNet [4], HiFaceGAN [10], mGANprior [3], PULSE [6] and pSp [7]. The visual comparisons on the BFR and FSR tasks are presented in Figure 1 and Figure 2, respectively.

## 2. Experiments on Images in the Wild

The 1,000 real-world low quality face images we collected from internet and our BFR results will be made publically available. As in Section 4.5 in the main manuscript, the methods Pix2PixHD [8], Super-FAN [1], GFRNet [5], GWAInet [2], DFDNet [4] and HiFaceGAN [10] are used in the comparison. Figure 3 shows the visual comparisons, demonstrating the superior performance of our method on restoring photo-realistic facial details.

## 3. Face Inpainting and Face Colorization

Though our method is designed for BFR, it can serve as a generic solution for other image-to-image tasks, such as face inpainting and face colorization, in which GAN prior plays a critical role.

**Face Inpainting.** Face inpainting aims to recover the missing pixels indicated by a binary mask in a face image. In this experiment, we treat the task as a blind face inpainting problem without using the binary mask. During training, we generate random holes with arbitrary shape in the high-quality face images on-the-fly as inputs. The model is updated following the same strategies and settings as in our main paper.

Figure 4 shows the qualitative comparisons of our method with the state-of-the-art face inpainting methods Deepfill v2 [11] and GMCNN [9], both of which require an extra binary mask to indicate the location of missing pixels. Our model demonstrates much better performance and it reproduces high-quality faces in a resolution of 1024<sup>2</sup>.

**Face Colorization.** Given a grayscale face as input, our model can also hallucinate a plausible color version of it. We update our model by taking a colored face image and its grayscale counterpart as a training pair. The training strategies and settings are inherited from our main paper.

We compare our GPEN with mGANprior [3], which uses the multi-code GAN prior, and the methods in [12, 13], which are specially designed for colorization task. Figure 5 presents the qualitative comparisons. It can be seen that our model can achieve favorably better face colorization results.

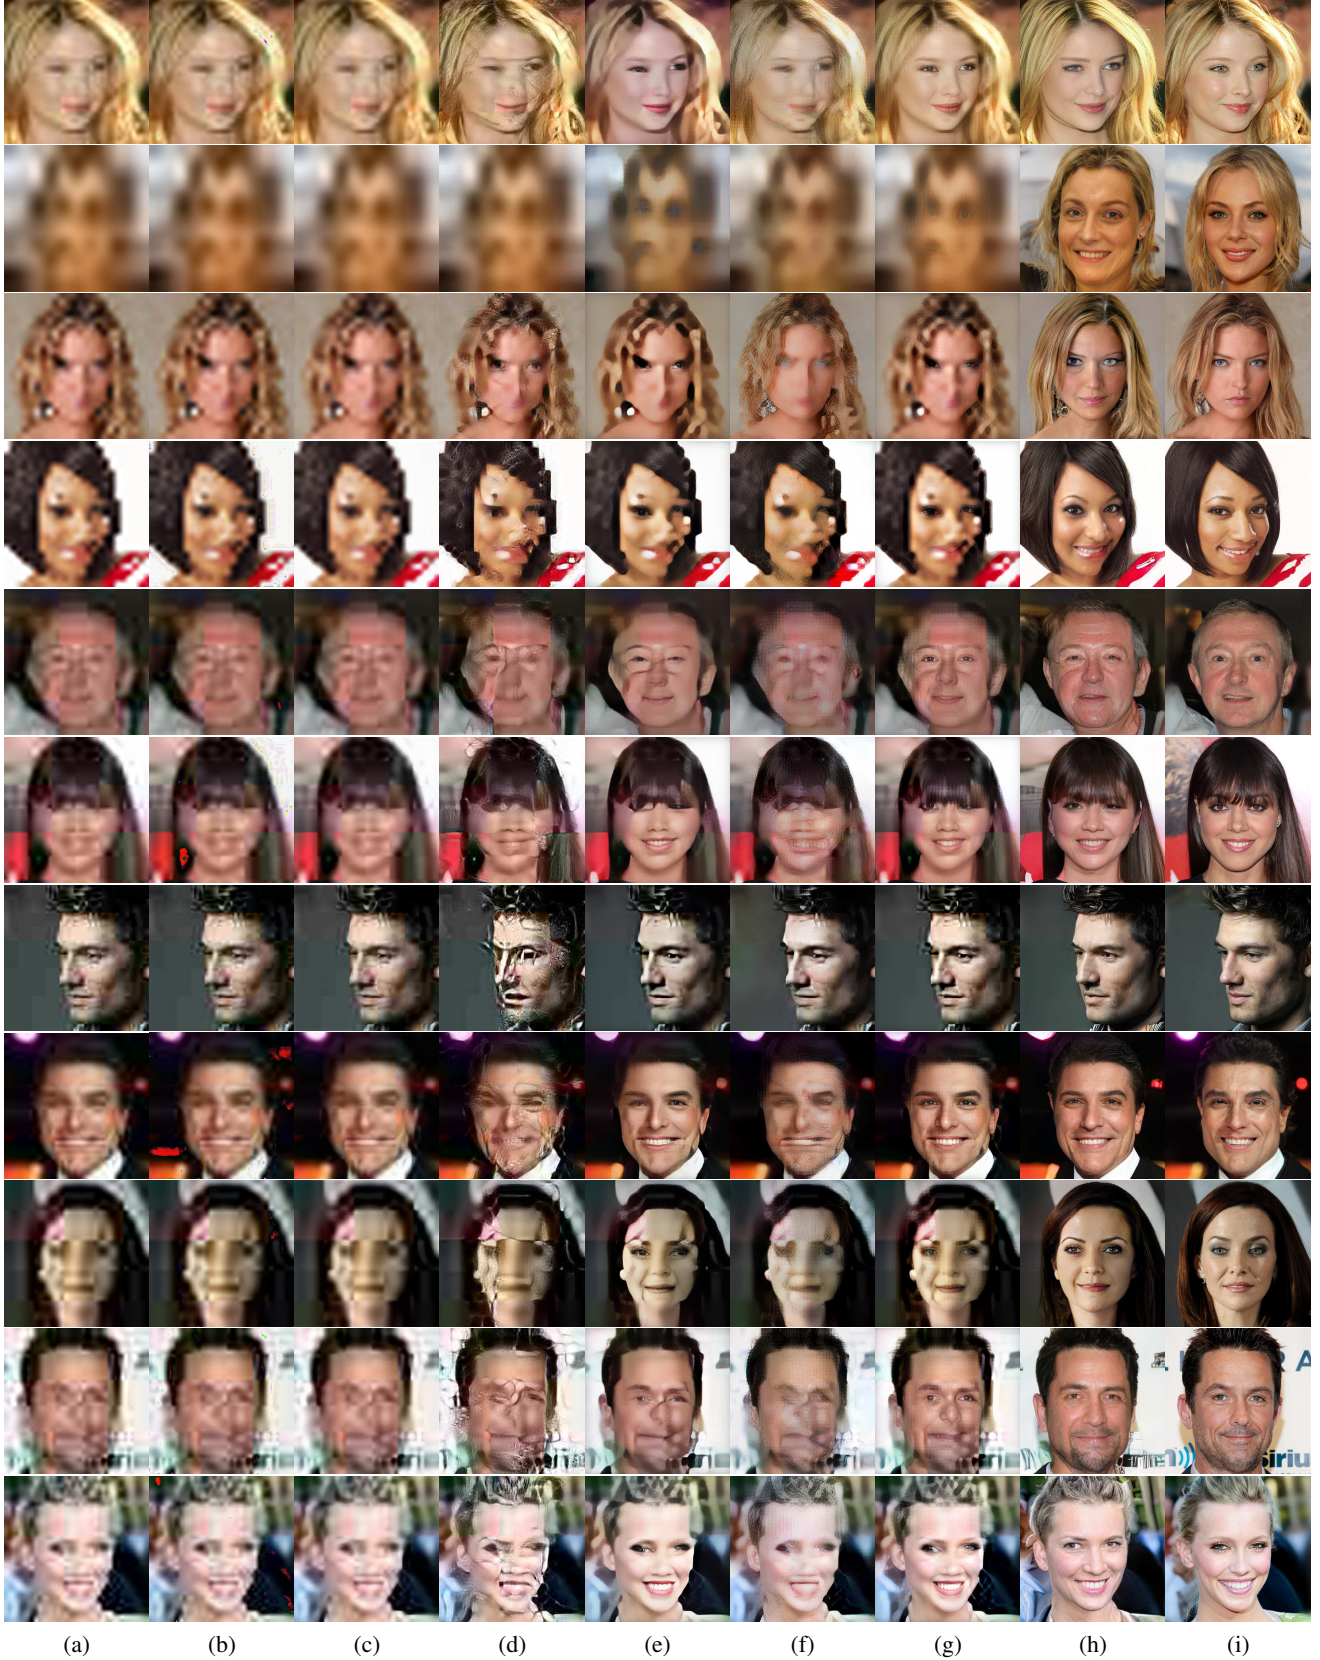

Figure 1: Blind face restoration results on synthetic face images. (a) Degraded faces; (b) Super-FAN [1]; (c) GFRNet [5]; (d) GWAInet [2]; (e) Pix2PixHD [8]; (f) DFDNet [4]; (g) HiFaceGAN [10]; (h) GPEN; (i) Ground truth.



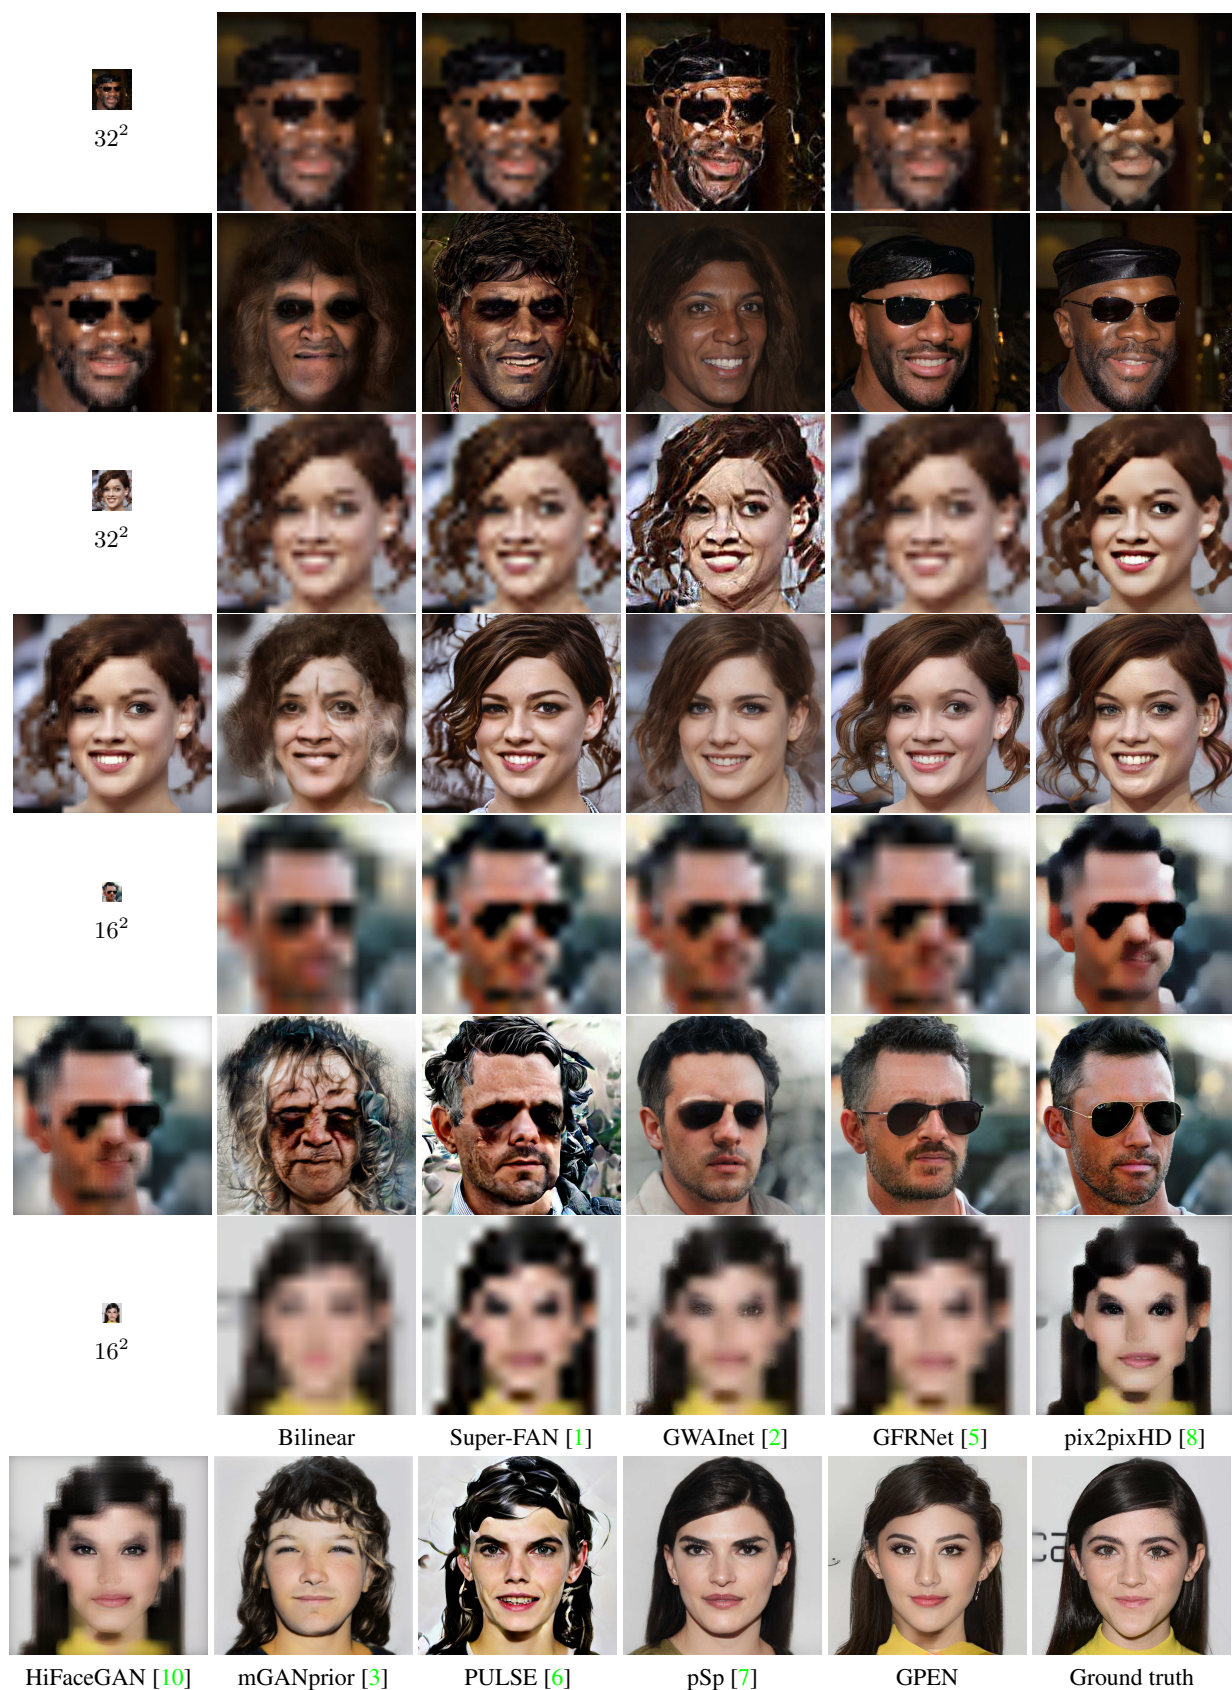

Figure 2: Face super-resolution results by state-of-the-art methods.



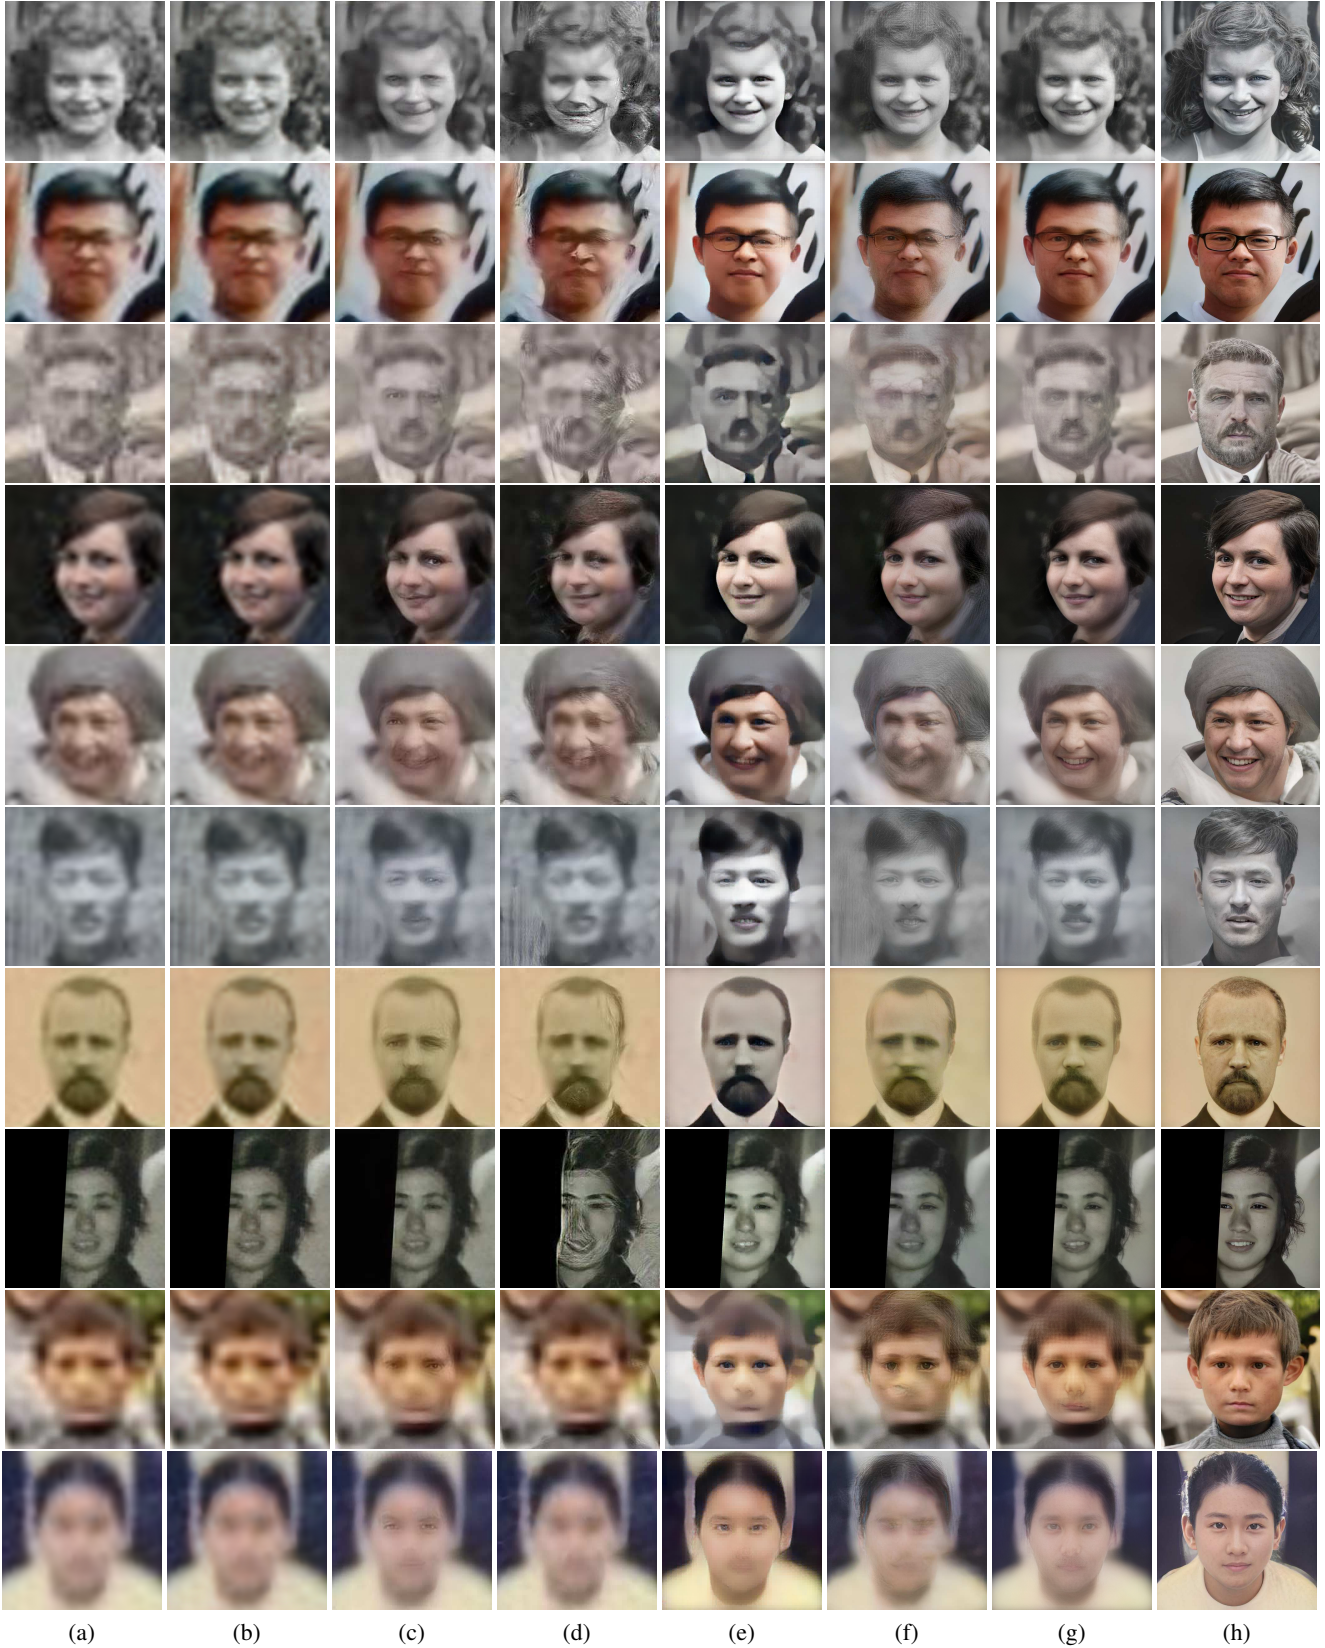



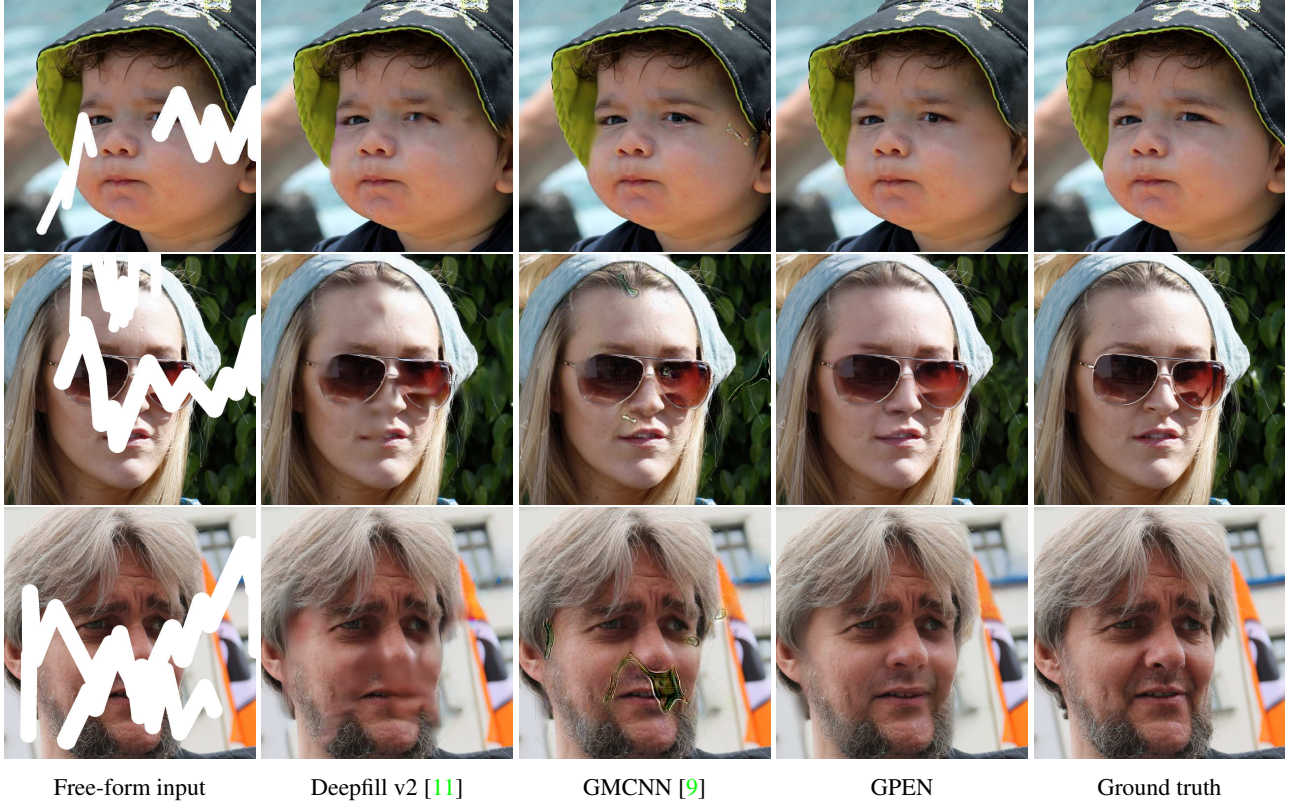

Figure 4: Qualitative comparison of different inpainting methods on high-quality faces (in  $1024^2$ ).

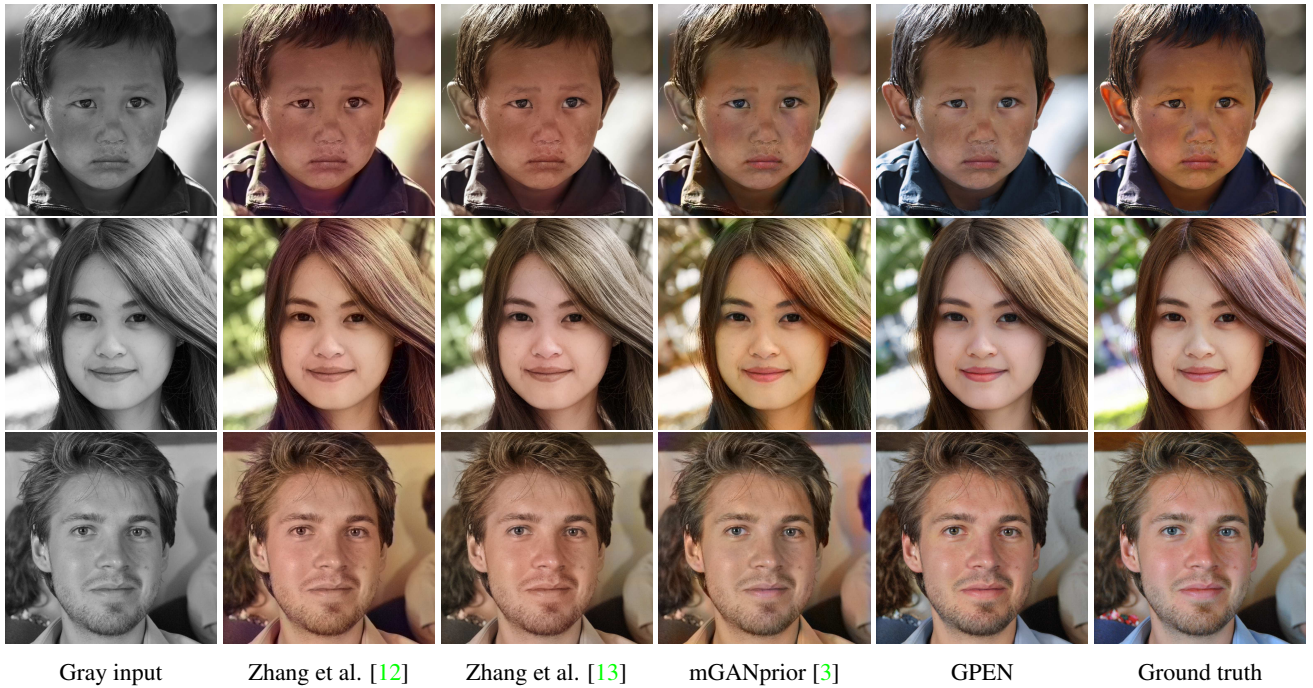

Figure 5: Qualitative comparison of different colorization methods on high-quality faces (in  $1024^2$ ).



## References

- [1] Adrian Bulat and Georgios Tzimiropoulos. Super-fan: Integrated facial landmark localization and super-resolution of real-world low resolution faces in arbitrary poses with gans. In *CVPR*, 2018. 1, 2, 3, 4
- [2] Berk Dogan, Shuhang Gu, and Radu Timofte. Exemplar guided face image super-resolution without facial landmarks. In *CVPRW*, 2019. 1, 2, 3, 4
- [3] Jinjin Gu, Yujun Shen, and Bolei Zhou. Image processing using multi-code gan prior. *ArXiv*, 2019. 1, 3, 5
- [4] Xiaoming Li, Chaofeng Chen, Shangchen Zhou, Xianhui Lin, Wangmeng Zuo, and Lei Zhang. Blind face restoration via deep multi-scale component dictionaries. In *ECCV*, 2020. 1, 2, 4
- [5] Xiaoming Li, Ming Liu, Yuting Ye, Wangmeng Zuo, Liang Lin, and Ruigang Yang. Learning warped guidance for blind face restoration. In *ECCV*, 2018. 1, 2, 3, 4
- [6] Sachit Menon, Alexandru Damian, Shijia Hu, Nikhil Ravi, and Cynthia Rudin. Pulse: Self-supervised photo upsampling via latent space exploration of generative models. In *CVPR*, 2020. 1, 3
- [7] Elad Richardson, Yuval Alaluf, Or Patashnik, Yotam Nitzan, Yaniv Azar, Stav Shapiro, and Daniel Cohen-Or. Encoding in style: a stylegan encoder for image-to-image translation. *Arxiv*, 2020. 1, 3
- [8] Ting-Chun Wang, Ming-Yu Liu, Jun-Yan Zhu, Andrew Tao, Jan Kautz, and Bryan Catanzaro. High-resolution image synthesis and semantic manipulation with conditional gans. In *CVPR*, 2018. 1, 2, 3, 4
- [9] Yi Wang, Xin Tao, Xiaojuan Qi, Xiaoyong Shen, and Jiaya Jia. Image inpainting via generative multi-column convolutional neural networks. *ArXiv*, 2018. 1, 5
- [10] Lingbo Yang, Chang Liu, Pan Wang, Shanshe Wang, Peiran Ren, Siweia Ma, and Gao Wen. Hifacegan: Face renovation via collaborative suppression and replenishment. *Arxiv*, 2020. 1, 2, 3, 4
- [11] Jiahui Yu, Zhe Lin, Jimei Yang, Xiaohui Shen, Xin Lu, and Thomas S Huang. Free-form image inpainting with gated convolution. *ArXiv*, 2018. 1, 5
- [12] Richard Zhang, Phillip Isola, and Alexei A Efros. Colorful image colorization. In *ECCV*, 2016. 1, 5
- [13] Richard Zhang, Jun-Yan Zhu, Phillip Isola, Xinyang Geng, Angela S Lin, Tianhe Yu, and Alexei A Efros. Real-time user-guided image colorization with learned deep priors. *ACM Transactions on Graphics (TOG)*, 9(4), 2017. 1, 5
